# Supplementary material for: FRET-assisted selective detection of flavins via cationic conjugated polyelectrolyte under physiological conditions
Source: Royal Society of Chemistry journal article supplement (doi:10.1039/c6tb01350c), 2016-01-01
Supplement: c6tb01350c1.pdf [file c6tb01350c1.pdf]

## **Electronic Supplementary Information**

FRET-assisted selective detection of flavins *via*  
cationic conjugated polyelectrolyte under  
physiological conditions

*Sameer Hussain,<sup>a</sup> Akhtar Hussain Malik,<sup>a</sup> and Parameswar Krishnan Iyer<sup>\*a,b</sup>*

<sup>a</sup>Department of Chemistry, Indian Institute of Technology Guwahati, Guwahati-781039, India

<sup>b</sup>Centre for Nanotechnology, Indian Institute of Technology Guwahati, Guwahati, 781039, India

AUTHOR EMAIL ADDRESS: [pki@iitg.ernet.in](mailto:pki@iitg.ernet.in)

AUTHOR FAX: +91 361 258 2349

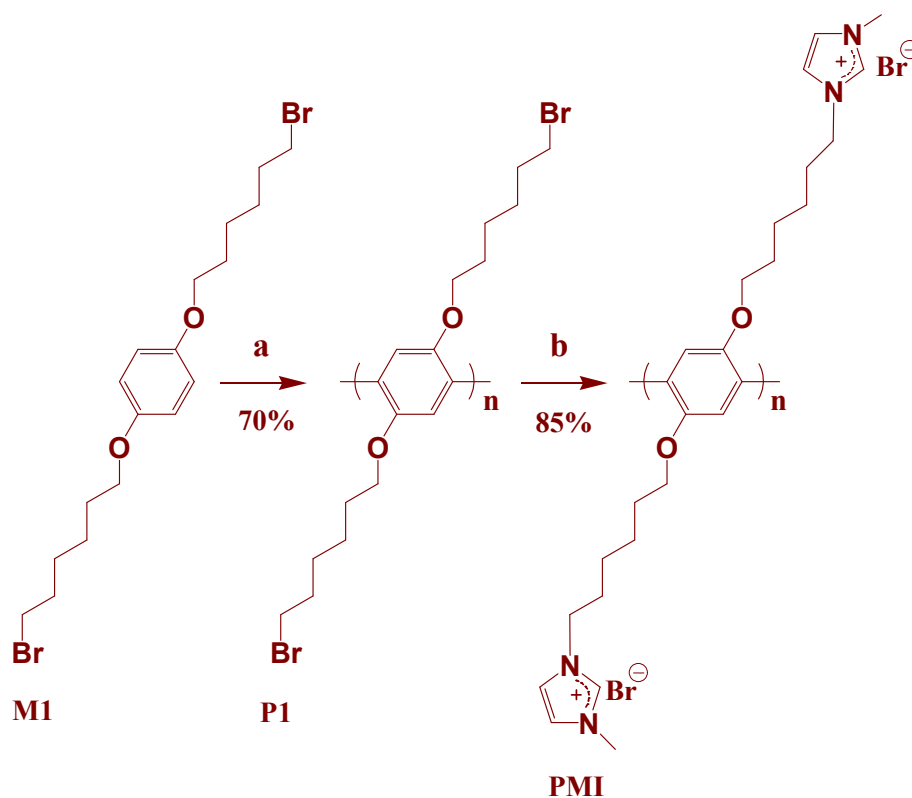

**Scheme S1.** (a) FeCl<sub>3</sub>, nitrobenzene, RT, 2 days (b) excess 1-methyl imidazole, reflux, 36 h.

### Synthesis of monomer and brominated polymer

Synthesis of monomer M1 and polymer P1 was performed using established method.<sup>1-2</sup>

### Synthesis of cationic polymer poly(1,4-bis-(6-(1-methylimidazolium)-hexyloxy)-benzene bromide) (PMI)

The cationic polymer poly(1,4-bis-(6-(1-methylimidazolium)-hexyloxy)-benzene bromide) (PMI) was synthesized using our earlier reported method.<sup>3</sup> In brief, P1 (0.12 mmol, 1 eq.) and excess 1-methyl imidazole were transferred to a 100mL round-bottom flask and kept for stirring at 80°C in an oil bath. After 36 h, the reaction mixture was poured into excess CHCl<sub>3</sub> followed by stirring for about 1 h to obtain brownish color precipitate. The process was repeated to remove excess P1 and 1-methyl imidazole. The precipitate was then dried and filtered out to get pure polymer PMI with 85% yield.

$^1\text{H}$  NMR (600 MHz, DMSO-*d*<sub>6</sub>,  $\delta$ ): 9.38 (b, 2H), 7.75 (b, 2H), 7.69 (b, 2H), 7.02 (b, 2H), 4.18 (b, 2H), 3.87 (b, 10H), 1.90 (b, 4H), 1.76 (b, 4H), 1.29 (b, 4H), 1.24 (b, 4H).

$^{13}\text{C}$  NMR (150 MHz, DMSO-*d*<sub>6</sub>,  $\delta$ ): 149.47, 136.50, 128.64, 123.50, 122.25, 114.20, 68.73, 48.69, 35.78, 29.79, 28.70, 28.49, 25.53.

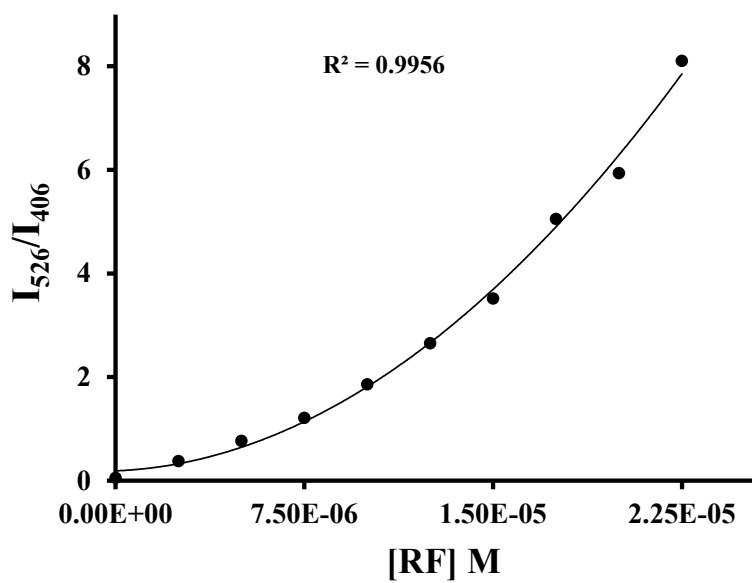

**Fig. S1** Calibration plot for RF in 10 mM HEPES buffer (pH=7.4) at room temperature.

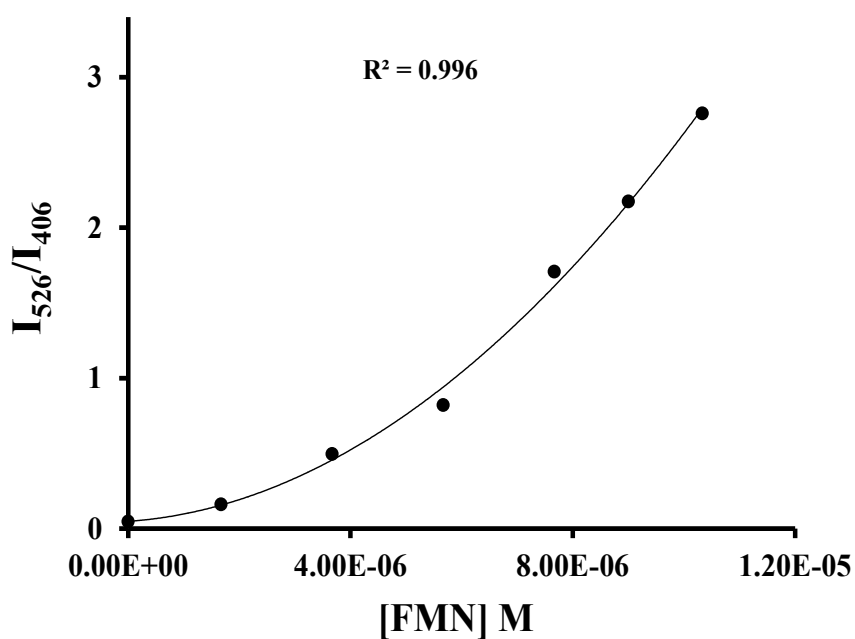

**Fig. S2** Calibration plot for FMN in 10 mM HEPES buffer (pH=7.4) at room temperature.

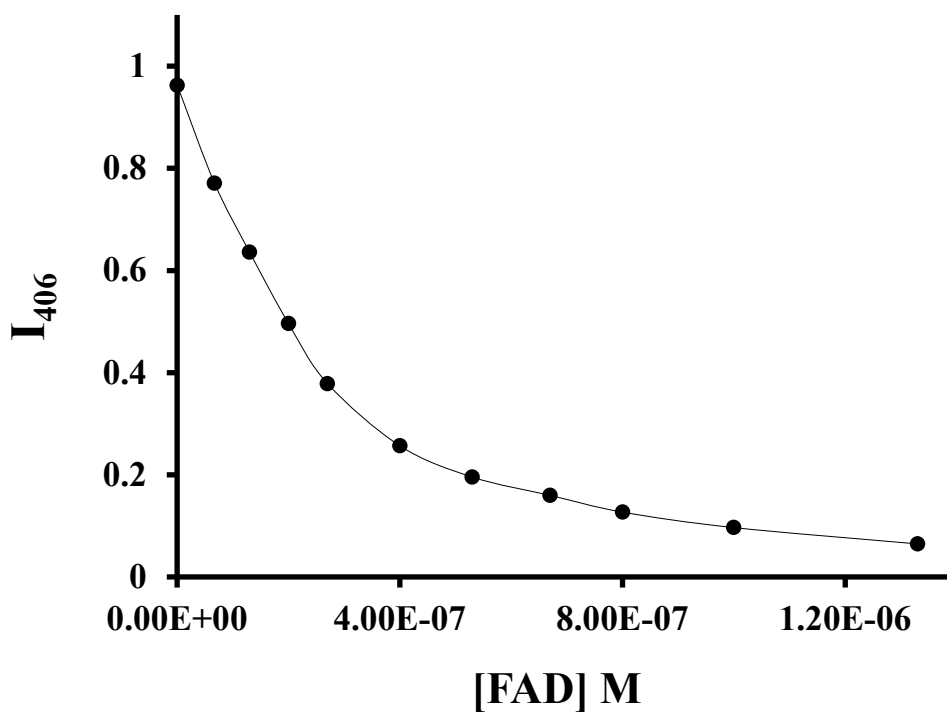

**Fig. S3** Calibration plot for FAD in 10 mM HEPES buffer (pH=7.4) at room temperature.

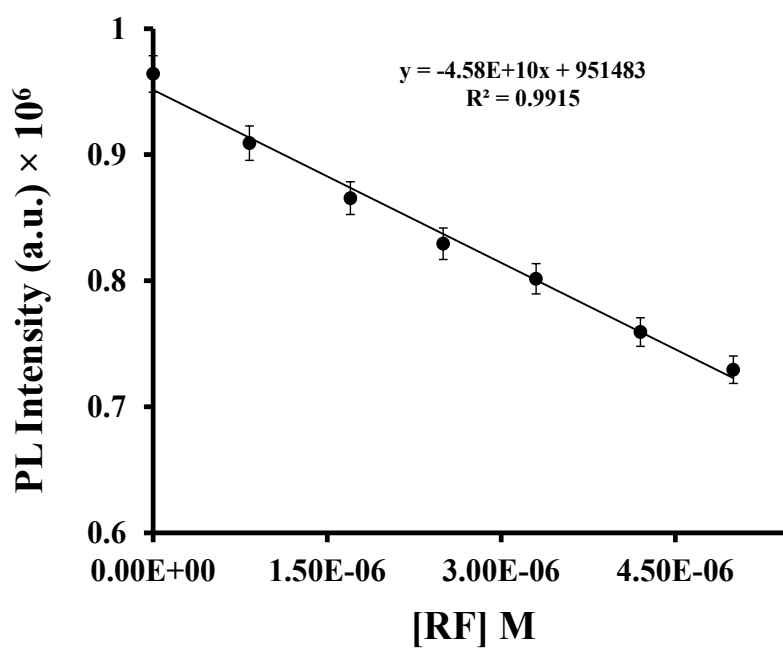

**Fig. S4** Detection limit limit plot for RF.

$$\text{LOD} = 3 \times \sigma/k$$

$$\text{LOD} = 3 \times 10548.54/4.58 \times 10^{10}$$

$$= 6.9 \times 10^{-7} \text{ M (690 nM)}$$

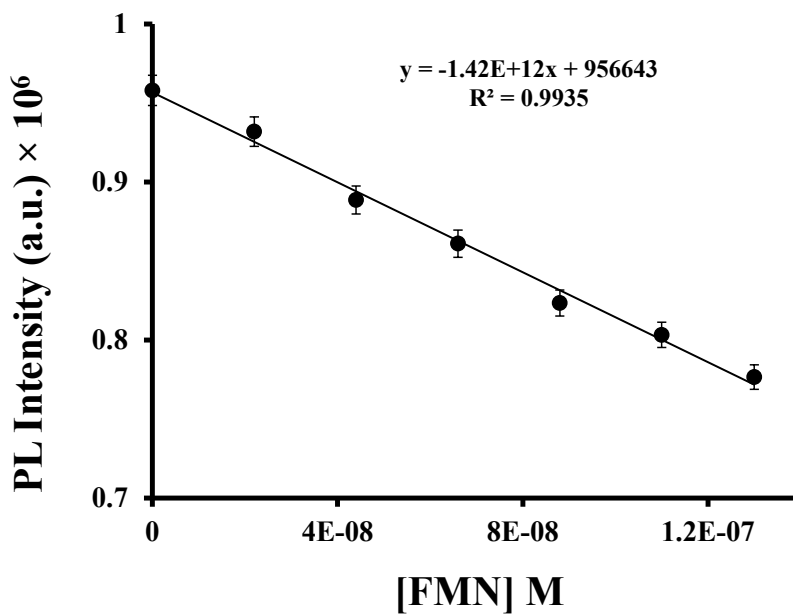

**Fig. S5** Detection limit plot for FMN.

$$\text{LOD} = 3 \times \sigma/k$$

$$\text{LOD} = 3 \times 9313.75/1.42 \times 10^{12}$$

$$= 1.97 \times 10^{-8} \text{ M (19.7 nM)}$$

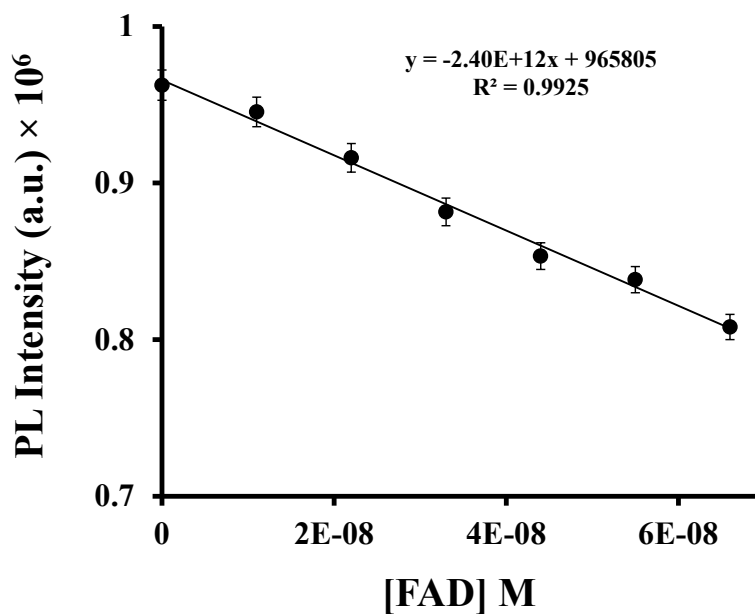

**Fig. S6** Detection limit plot for FAD.

$$\text{LOD} = 3 \times \sigma/k$$

$$\text{LOD} = 3 \times 10721.55/2.40 \times 10^{12}$$

$$= 1.34 \times 10^{-8} \text{ M (13.4 nM)}$$

**File: PMIex336em406cnt2500ns50.FL**

**v Discrete Components Analysis (Reconvolution)**

Fitting range : [550; 1500] channels  
c<sup>2</sup> : 1.055

| Exp Num | B     | err <sub>B</sub> | f     | err <sub>f</sub> | t (ns) | err <sub>t</sub> |
|---------|-------|------------------|-------|------------------|--------|------------------|
| 1       | 0.081 | 0.017            | 100.0 | 15.96            | 1.190  | 0.003            |

Background : 2.613 Background error : 0.117  
Shift : -1.474 ns Shift error : 20.53  
IRF Background : 0.115 fixed

**File: PMI+RFex336em406cnt2500ns50.FL**

**v Discrete Components Analysis (Reconvolution)**

Fitting range : [550; 1600] channels  
c<sup>2</sup> : 0.985

| Exp Num | B     | err <sub>B</sub> | f     | err <sub>f</sub> | t (ns) | err <sub>t</sub> |
|---------|-------|------------------|-------|------------------|--------|------------------|
| 1       | 0.060 | 0.017            | 70.07 | 18.08            | 0.405  | 0.061            |
| 2       | 0.007 | 6.7e-4           | 29.93 | 2.971            | 1.186  | 0.009            |

Background : 1.978 Background error : 0.086  
Shift : -0.415 ns Shift error : 10.04  
IRF Background : 0.115 fixed

**File: PMI+FMN336em406cnt2500ns50.FL**

**v Discrete Components Analysis (Reconvolution)**

Fitting range : [550; 1450] channels  
c<sup>2</sup> : 1.044

| Exp Num | B     | err <sub>B</sub> | f     | err <sub>f</sub> | t (ns) | err <sub>t</sub> |
|---------|-------|------------------|-------|------------------|--------|------------------|
| 1       | 0.039 | 0.006            | 65.14 | 15.38            | 0.589  | 0.054            |
| 2       | 0.009 | 8.1e-4           | 34.86 | 3.579            | 1.182  | 0.017            |

Background : 1.983 Background error : 0.146  
Shift : -0.354 ns Shift error : 8.275  
IRF Background : 0.115 fixed

**File: PMI+FADex336em406cnt2500ns50.FL**

**v Discrete Components Analysis (Reconvolution)**

Fitting range : [550; 1500] channels  
c<sup>2</sup> : 1.015

| Exp Num | B     | err <sub>B</sub> | f     | err <sub>f</sub> | t (ns) | err <sub>t</sub> |
|---------|-------|------------------|-------|------------------|--------|------------------|
| 1       | 0.030 | 0.003            | 63.68 | 11.53            | 0.593  | 0.043            |
| 2       | 0.008 | 5.6e-4           | 36.32 | 3.025            | 1.206  | 0.010            |

Background : 1.891 Background error : 0.123  
Shift : -0.219 ns Shift error : 5.530  
IRF Background : 0.115 fixed

**Fig. S7** Fitting parameters and IRF values correspond to lifetime measurements.

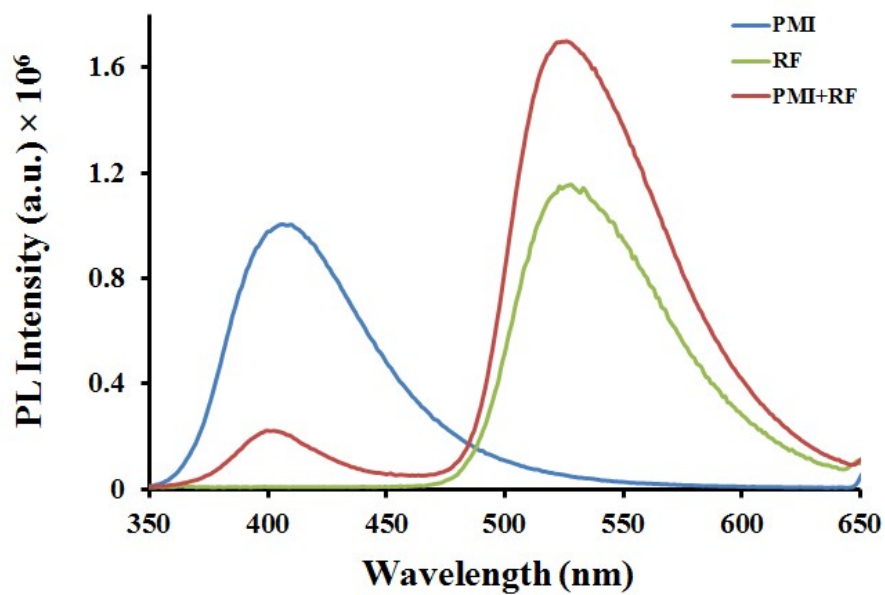

**Fig. S8** Emission spectra of PMI, RF and the PMI/RF mixture at  $\lambda_{\text{ex}}=325$  nm.

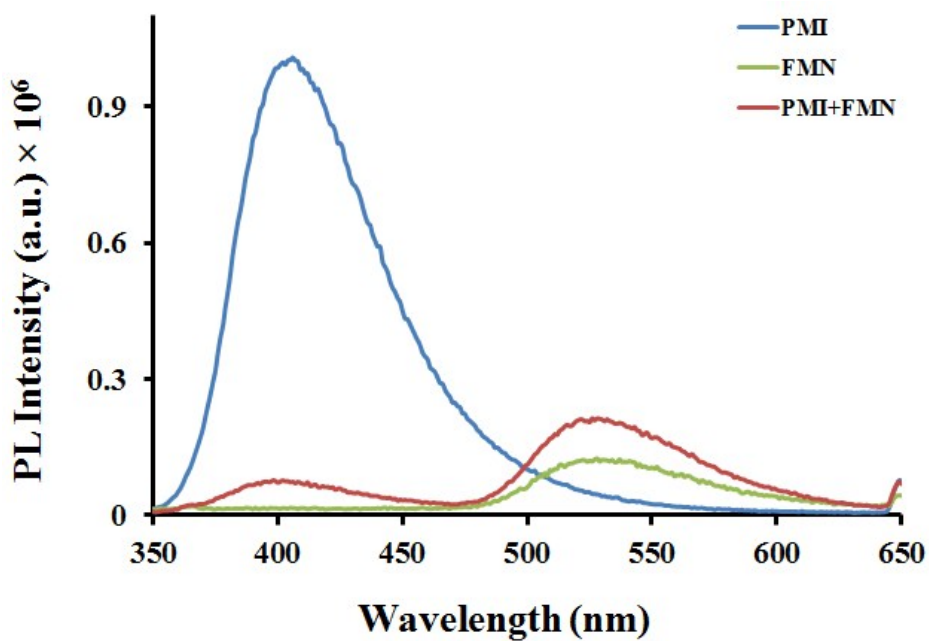

**Fig. S9** Emission spectra of PMI, FMN and the PMI/FMN mixture at  $\lambda_{\text{ex}}=325$  nm.

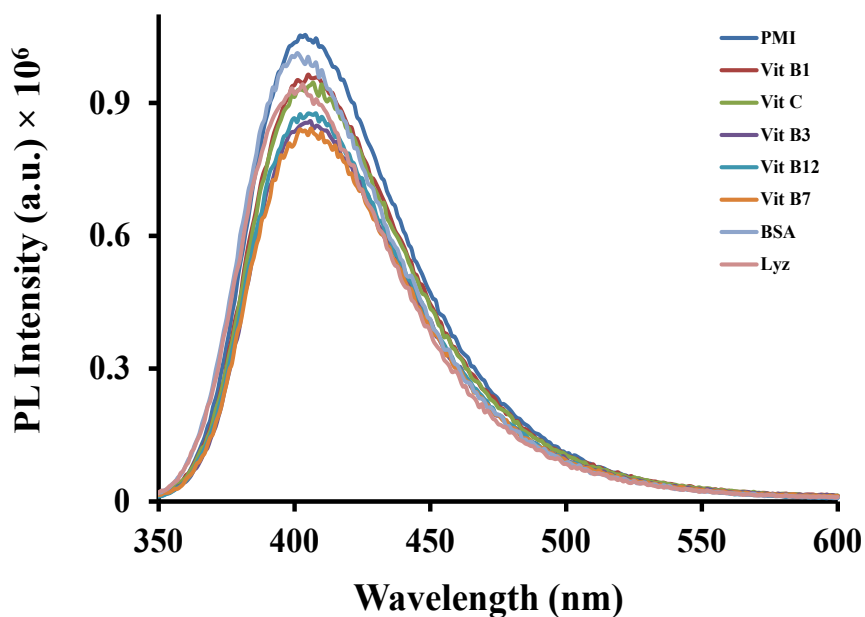

**Fig. S10** Effect of various other vitamins, protein (BSA) and enzyme (lysozyme) on the emission of PMI in 10 mM HEPES buffer (pH=7.4) at room temperature. Concentration of PMI and each analyte were 10  $\mu$ M and 25  $\mu$ M, respectively.

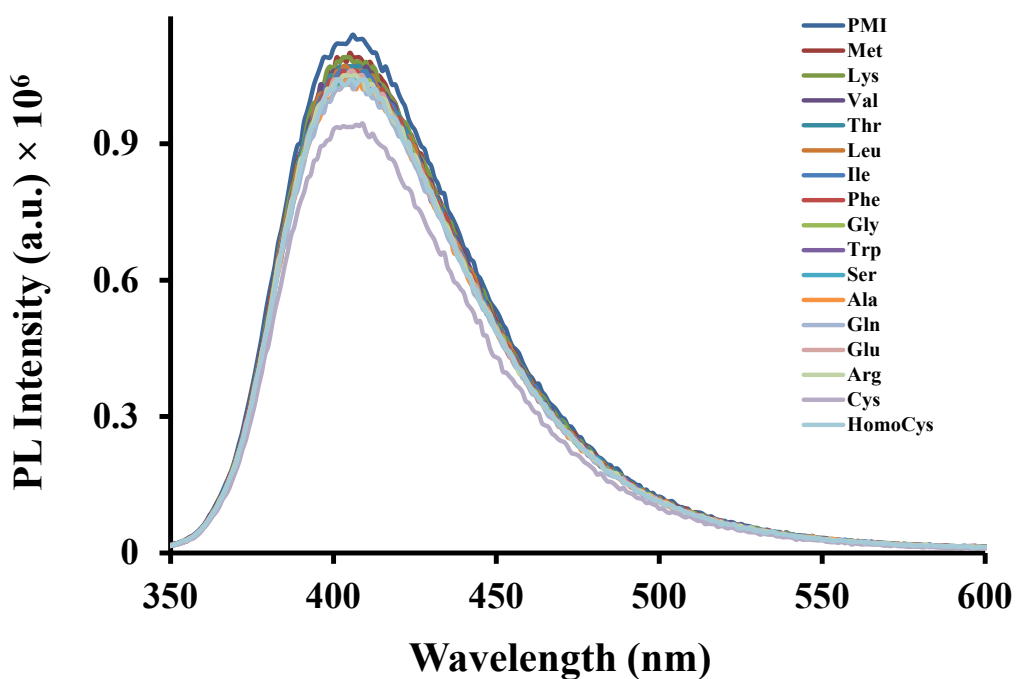

**Fig. S11** Effect of various amino acids (25  $\mu$ M) on the emission of PMI (10  $\mu$ M) in 10 mM HEPES buffer (pH=7.4) at room temperature.



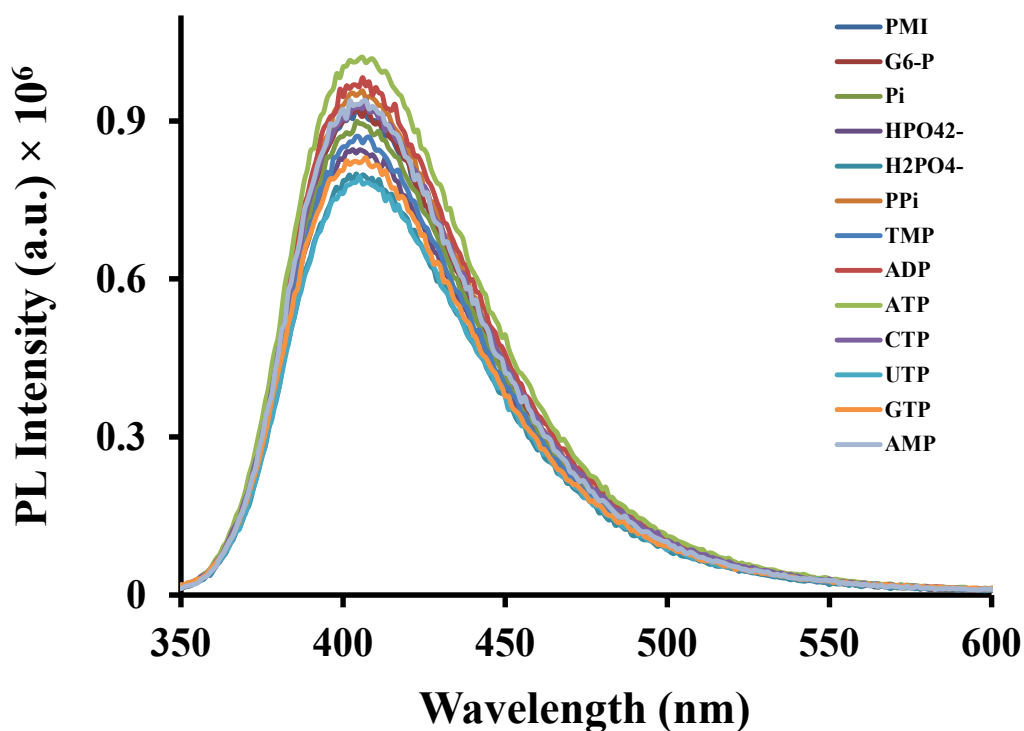

**Fig. S12** Effect of various inorganic and organic phosphates on the emission of PMI in 10 mM HEPES buffer (pH=7.4) at room temperature. Concentration of PMI and each analyte were 10  $\mu$ M and 25  $\mu$ M, respectively.

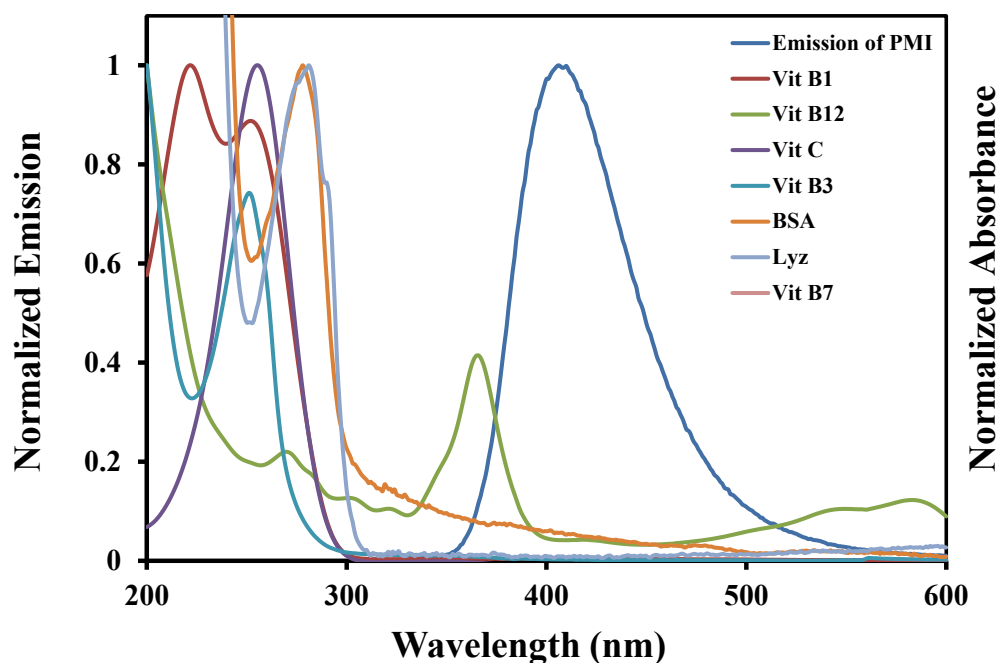

**Fig. S13** Spectral overlap between emission spectrum of PMI and absorption spectra of various other vitamins, protein (BSA) and enzyme (lysozyme).

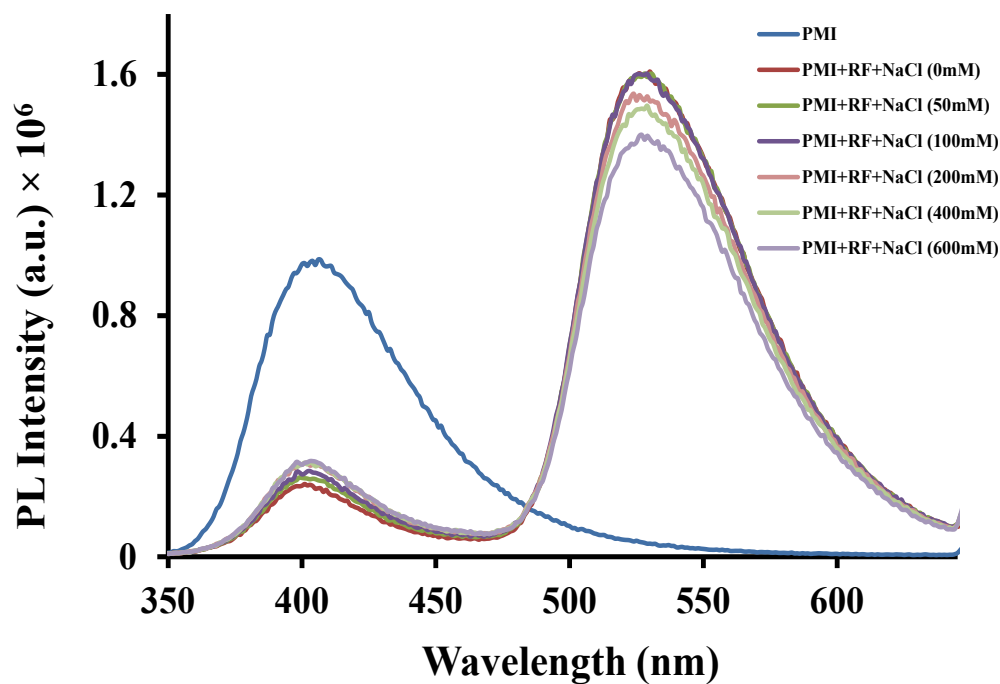

**Fig. S14** Effect of ionic strength on FRET efficiency for RF detection. Concentration of PMI and RF were 10  $\mu$ M and 25  $\mu$ M, respectively.

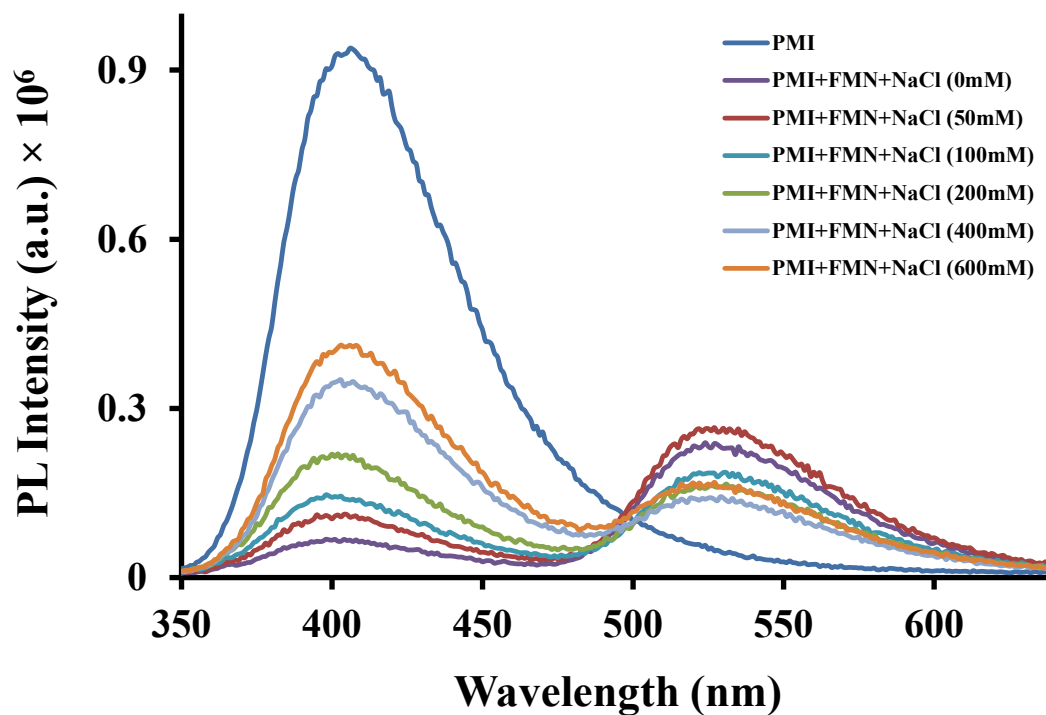

**Fig. S15** Effect of ionic strength on FRET efficiency for FMN detection. Concentration of PMI and FMN were 10  $\mu$ M and 10.33  $\mu$ M, respectively.

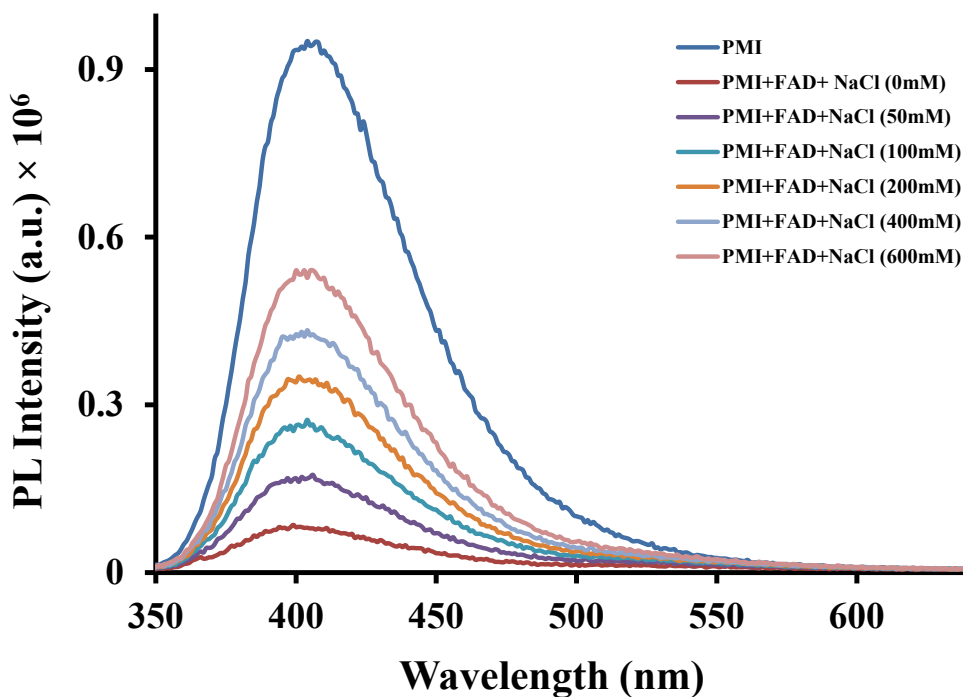

**Fig. S16** Effect of ionic strength on FRET efficiency for FAD detection. Concentration of PMI and FAD were 10  $\mu\text{M}$  and 1.33  $\mu\text{M}$ , respectively.

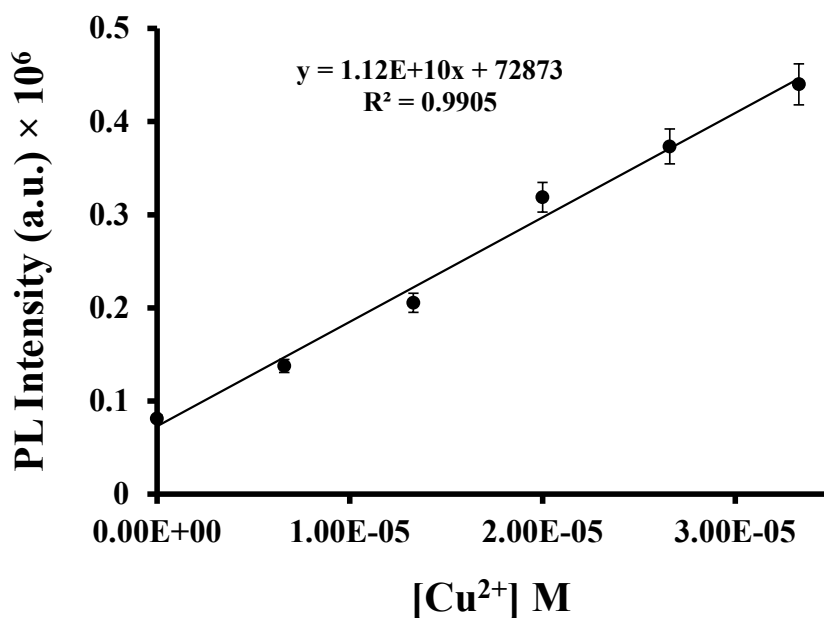

**Fig. S17** Detection limit plot for  $\text{Cu}^{2+}$  using PMI/FMN complex.

$$\text{LOD} = 3 \times \sigma/k$$

$$\text{LOD} = 3 \times 2100.54/1.12 \times 10^{10}$$

$$= 5.62 \times 10^{-7} \text{ M (0.56 } \mu\text{M)}$$

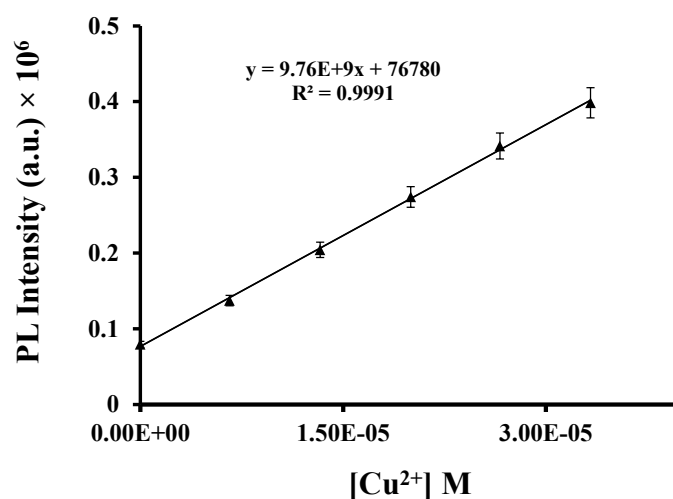

**Fig. S18** Detection limit plot for  $\text{Cu}^{2+}$  using PMI/FAD complex.

$$\text{LOD} = 3 \times \sigma/k$$

$$\text{LOD} = 3 \times 2802.44/9.76 \times 10^{10}$$

$$= 8.61 \times 10^{-7} \text{ M (0.86 } \mu\text{M)}$$

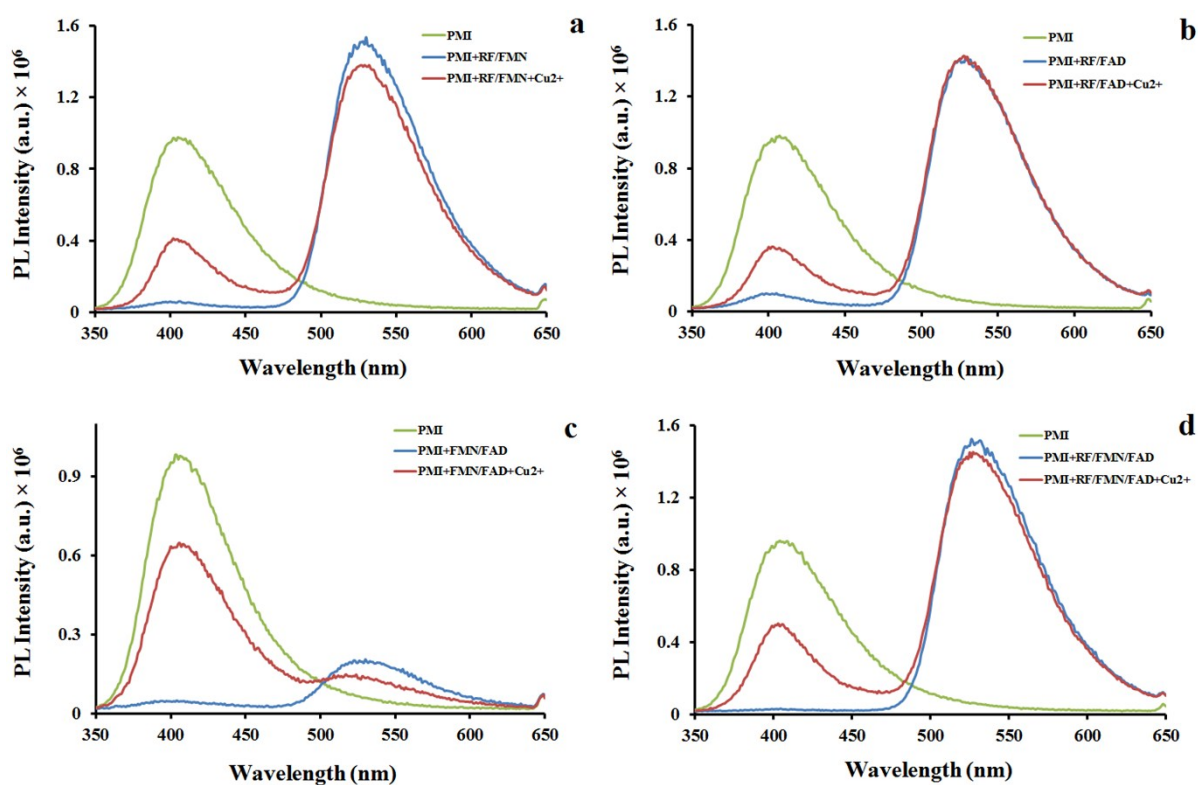

**Fig. S19** Change in emission spectra on adding  $\text{Cu}^{2+}$  ( $6.6 \times 10^{-5} \text{ M}$ ) to the solution of PMI ( $10 \mu\text{M}$ ) containing mixture of (a) RF/FMN ( $25 \mu\text{M}/10.33 \mu\text{M}$ ), (b) RF/FAD ( $25 \mu\text{M}/1.33 \mu\text{M}$ ), (c) FMN/FAD ( $10.33 \mu\text{M}/1.33 \mu\text{M}$ ) and (d) RF/FMN/FAD ( $25 \mu\text{M}/10.33 \mu\text{M}/1.33 \mu\text{M}$ ) in  $10 \text{ mM}$  HEPES buffer ( $\text{pH}=7.4$ ).

**Table S1.** A comparative study of the some best fluorometric based probes for the detection of flavins.

| Publication                                                   | Material used                                 | Sensing analytes                        | Detection Method           | Discrimination           | LOD                                               |
|---------------------------------------------------------------|-----------------------------------------------|-----------------------------------------|----------------------------|--------------------------|---------------------------------------------------|
| <b>Current Work</b>                                           | <b>Conjugated Polyelectrolyte</b>             | <b>RF, FMN, FAD and Cu<sup>2+</sup></b> | <b>FRET</b>                | <b>RF/FMN and RF/FAD</b> | <b>RF-0.69 μM, FMN-19.68 nM and FAD-13.40 nM)</b> |
| <i>J. Am. Chem. Soc.</i> <b>2007</b> , 129, 4524-4525         | Bis(Zn <sup>2+</sup> -dipicolylamine complex) | FAD                                     | Direct fluorescence method | Not shown                | Not determined (Detection in μM range)            |
| <i>ACS Appl. Mater. Interfaces</i> <b>2013</b> , 5, 7392-7399 | Sulfonated Graphene                           | RF and FMN                              | FRET                       | Not shown                | 0.6 μg/mL (1.6 μM)                                |
| <i>Angew. Chem. Int. Ed.</i> <b>2006</b> , 45, 1563-1568      | DNA-duplex Aptamer                            | RF                                      | Direct fluorescence method | Not shown                | Not determined                                    |
| <i>Organic Letters</i> , <b>2013</b> , 15, 1210-1213          | Pyrene bound Zn <sup>2+</sup> -dipicolylamine | FMN and FAD                             | Ratiometric method         | FMN/FAD                  | Not determined (Detection in μM range)            |
| <i>Org. Biomol. Chem.</i> <b>2016</b> , 14, 447-450           | RNA Aptamer                                   | FAD                                     | Direct fluorescence method | Not shown                | Not determined                                    |
| <i>J. Phys. Chem. B</i> <b>2010</b> , 114, 10717-10727        | Cucurbit[7]uril                               | RF and FAD                              | Direct fluorescence method | RF/FAD                   | Not determined                                    |
| <i>J. Am. Chem. Soc.</i> <b>1995</b> , 117, 1246-1257         | RNA Aptamer                                   | RF                                      | Direct fluorescence method | Not shown                | Not determined                                    |

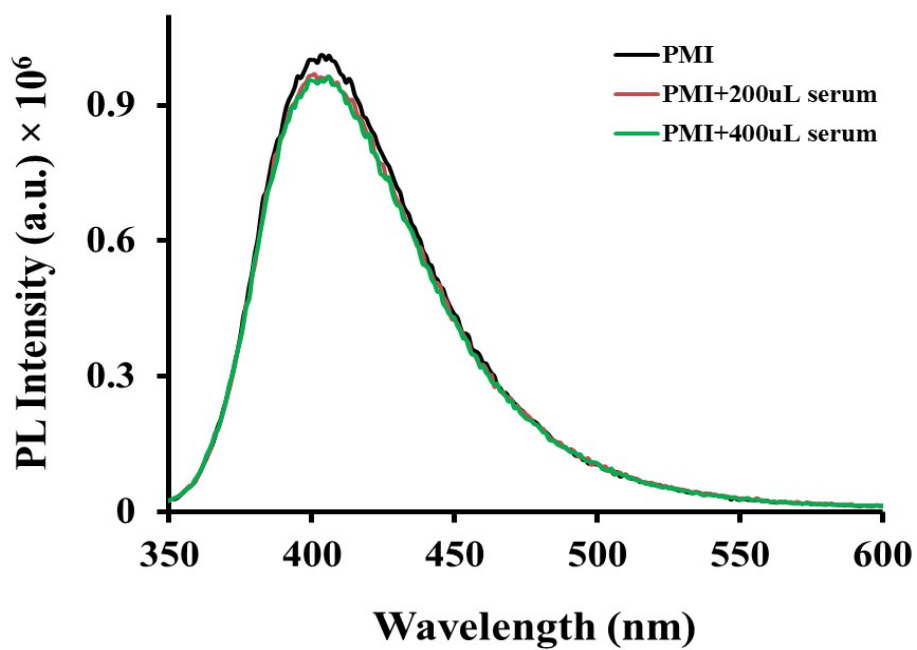

Fig. S20 Change in emission of PMI after adding undoped serum samples.

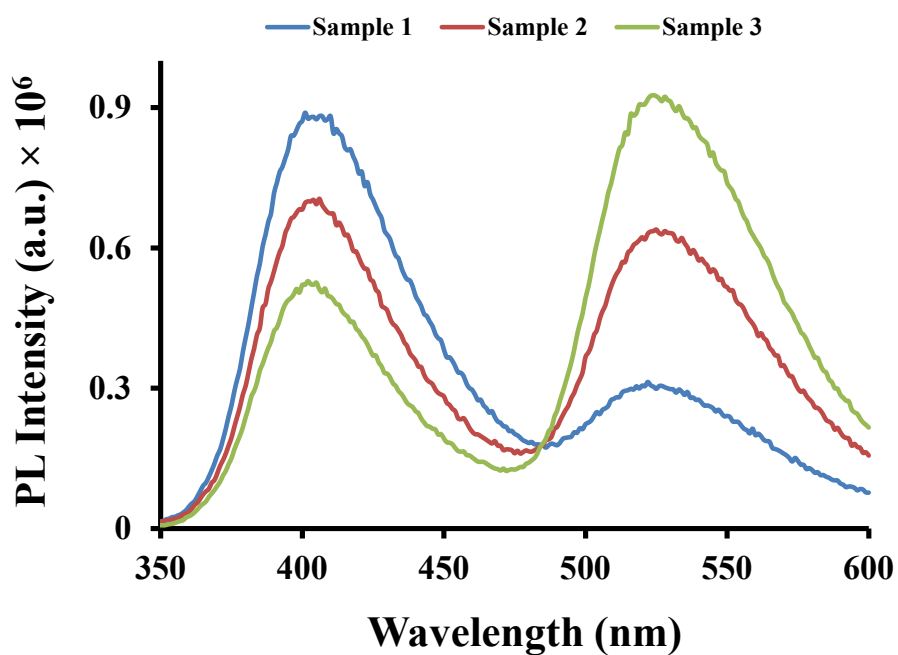

Fig. S21 Change in emission of PMI after adding RF-doped serum samples.

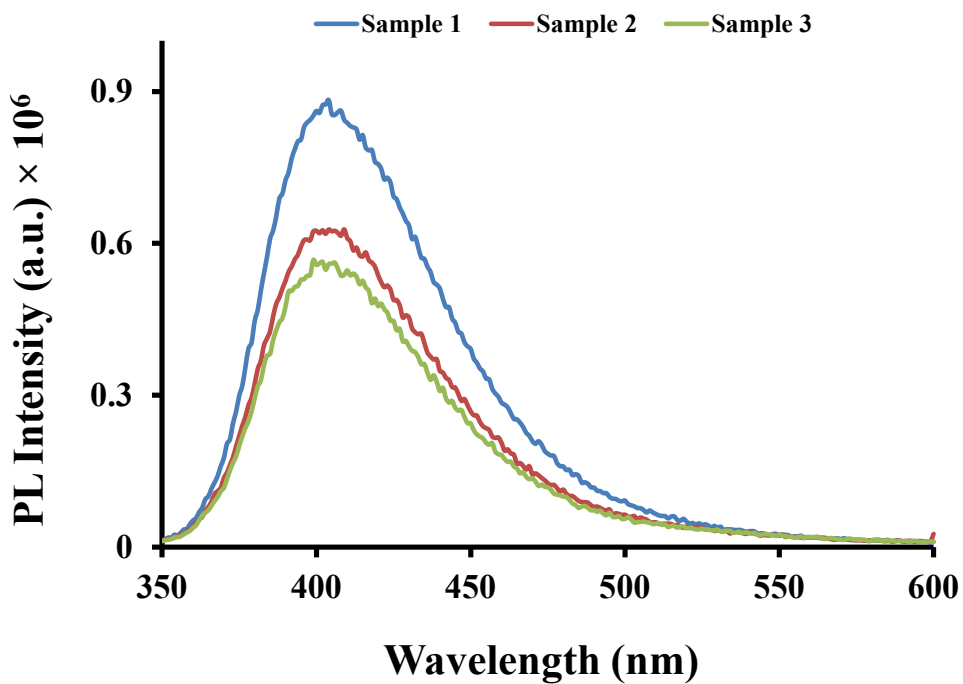

**Fig. S22** Change in emission of PMI after adding FMN-doped serum samples.

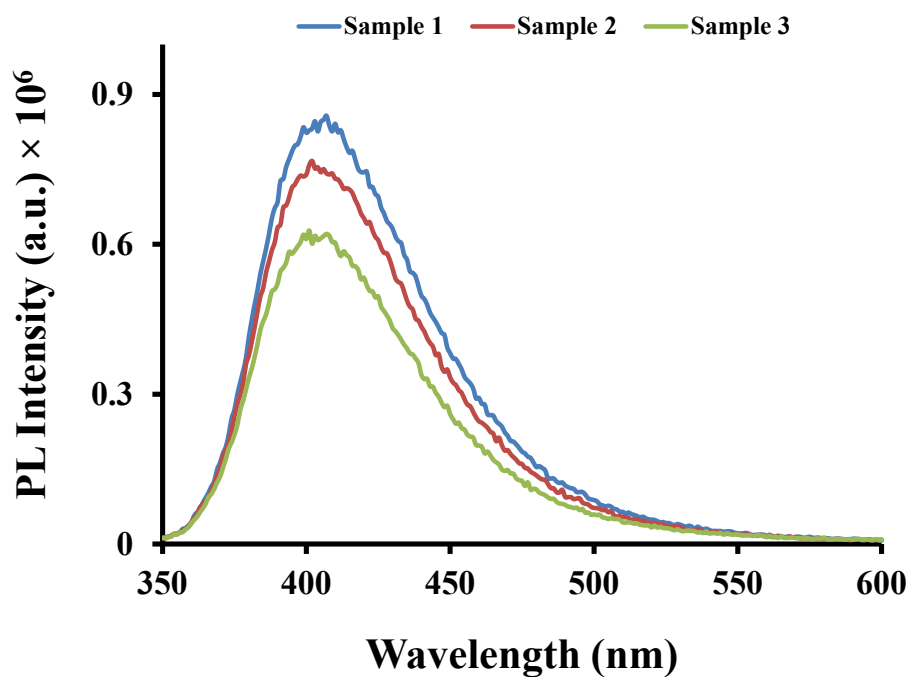

**Fig. S23** Change in emission of PMI after adding FAD-doped serum samples.

## References:

1. A. J. J. M. van Breemen, P. T. Herwig, C. H. T. Chlon, J. Sweelssen, H. F. M. Schoo, E. M. Benito, D. M. de Leeuw, C. Tanase, J. Wildeman and P. W. M. Blom, *Adv. Funct. Mater.* 2005, **15**, 872-876.
2. G. Saikia, R. Singh, P. J. Sarmah, M. W. Akhtar, J. Sinha, M. Katiyar and P. K. Iyer, *Macromol. Chem. Phys.* 2009, **210**, 2153-2159.
3. S. Hussain, A. H. Malik and P. K. Iyer, *ACS Appl. Mater. Interfaces*, 2015, **7**, 3189-3198.
